# Supplementary material
Source: PubMed Central journal article supplement (PMC4652182)
Supplement: Supp_Table1.pdf [file Supp_Table1.pdf]

## Supplementary Data

SUPPLEMENTARY TABLE S1. FIDELITY SCORE

|                                                                                                     | <i>Usual care</i><br>(n=26) | <i>GD Choice</i><br>(n=28) | <i>Total</i><br>(N=54) | p-Value |
|-----------------------------------------------------------------------------------------------------|-----------------------------|----------------------------|------------------------|---------|
| The clinician described ATDs                                                                        | 23 (89)                     | 27 (96)                    | 50 (93)                | 0.25    |
| The clinician described RAI                                                                         | 26 (100)                    | 27 (96)                    | 53 (98)                |         |
| The clinician described surgery                                                                     | 26 (100)                    | 27 (96)                    | 53 (98)                |         |
| The clinician stated that after RAI, patients should avoid contact with children and pregnant women | 4 (15)                      | 11 (41)                    | 15 (28)                | 0.07    |
| The clinician stated the RAI fertility considerations                                               | 7 (27)                      | 14 (52)                    | 21 (40)                | 0.08    |
| The clinician stated the possibility of a permanent scar as a complication of surgery               | 6 (23)                      | 14 (52)                    | 20 (38)                | 0.041   |
| The clinician stated the possibility of hoarseness as a complication of surgery                     | 1 (3)                       | 16 (59)                    | 17 (32)                | <0.01   |
| The clinician described medication administration                                                   | 17 (65)                     | 23 (82)                    | 40 (74)                | 0.16    |
| The clinician stated when the symptoms of GD will disappear with each option                        | 4 (16)                      | 13 (46)                    | 17 (32)                | 0.02    |
| Missing                                                                                             | 1                           | 0                          | 1                      |         |
| The clinician used graphics to communicate risk with each option                                    | 1 (4)                       | 14 (52)                    | 15 (29)                | <0.01   |
| Missing                                                                                             | 1                           | 1                          | 2                      |         |
| The clinician used whole numbers to communicate risk with each option                               | 0 (0)                       | 12 (43)                    | 12 (23)                | <0.01   |
| Missing                                                                                             | 1                           | 0                          | 1                      |         |
| The clinician communicated cost of the options for treatment                                        | 0 (0)                       | 9 (32)                     | 9 (17)                 | <0.01   |
| Missing                                                                                             | 1                           | 0                          | 1                      |         |
| The clinician used graphics to communicate risk with each option                                    | 0 (0)                       | 13 (48)                    | 13 (25)                | <0.01   |
| Missing                                                                                             | 1                           | 1                          | 2                      |         |
| The clinician used whole numbers to communicate risk with each option                               | 0 (0)                       | 10 (36)                    | 10 (19)                | <0.01   |
| Missing                                                                                             | 1                           | 0                          | 1                      |         |
| The clinician described the need for thyroid replacement as a lifelong commitment                   | 18 (72)                     | 26 (93)                    | 44 (83)                | 0.07    |
| Missing                                                                                             | 1                           | 0                          | 1                      |         |
| The clinician described the need for and frequency of blood test monitoring                         | 9 (36)                      | 16 (57)                    | 25 (47)                | 0.12    |
| Missing                                                                                             | 1                           | 0                          | 1                      |         |
