# Supplementary material
Source: PubMed Central journal article supplement (PMC4652182)
Supplement: Supp_Table2.pdf [file Supp_Table2.pdf]

SUPPLEMENTARY TABLE S2. KNOWLEDGE TRANSFER

|                                                                                                                                       | <i>Usual<br/>care (n=31)</i> | <i>GD Choice<br/>(n=23)</i> | <i>Total<br/>(N=54)</i> | <i>p-Value</i> |
|---------------------------------------------------------------------------------------------------------------------------------------|------------------------------|-----------------------------|-------------------------|----------------|
| Overall knowledge                                                                                                                     |                              |                             |                         | 0.33           |
| Median (IQR)                                                                                                                          | 4 (3–5)                      | 4 (3–5)                     |                         |                |
| <i>Correct responses by each knowledge question:</i>                                                                                  |                              |                             |                         |                |
| People can get better from Graves' disease with no treatment.                                                                         | 25 (81)                      | 17 (74)                     | 42 (78)                 | 0.56           |
| People with Graves' disease who get better with antithyroid pills<br>are not cured and the disease can return.                        | 22 (71)                      | 19 (83)                     | 41 (76)                 | 0.36           |
| It never takes more than one dose of radioactive iodine to cure<br>Graves' disease.                                                   | 21 (68)                      | 15 (65)                     | 36 (67)                 | 0.85           |
| People with Graves' disease who are treated with radioactive iodine<br>may need thyroid replacement pills for the rest of their lives | 28 (90)                      | 21 (91)                     | 49 (91)                 | 0.99           |
| People with Graves' disease who have surgery may have problems<br>with their voice.                                                   | 17 (55)                      | 19 (83)                     | 36 (67)                 | 0.043          |

Wilcoxon rank-sum test statistic *p*-value or chi-square or fisher's exact test *p*-value, as appropriate for data.
